# Supplementary material for: A co-delivery system based on a reduction-sensitive polymeric prodrug capable of loading hydrophilic and hydrophobic drugs for combination chemotherapy
Source: Royal Society of Chemistry journal article supplement (doi:10.1039/c6py00900j), 2016-01-01
Supplement: c6py00900j1.pdf [file c6py00900j1.pdf]

## **Supporting Information**

*of*

### **A co-delivery system based on reduction-sensitive polymeric prodrug capable of loading hydrophilic and hydrophobic drugs for combination chemotherapy**

Xiaoqing Yi, Dan Zhao, Quan Zhang, Jiaqi Xu, Gongdao Yuan, Renxi Zhuo and Feng Li\*

Key Laboratory of Biomedical Polymers of Ministry of Education & Department of Chemistry, Wuhan University, Wuhan 430072, P. R. China.

\*Corresponding author. E-mail: lifeng@whu.edu.cn.

**Table S1.** The IC<sub>50</sub> (mg/L) of free PTX and prodrug nanoparticles against HeLa and MCF-7/ADR cells for 48 h incubation time.

| Cells     | PTX  | DOX•H<br>Cl | UCL-<br>PMP-1 | UCL-<br>PMP-2 | UCL-<br>PMP-3 | CL-<br>PMP-1 | CL-<br>PMP-2 | CL-<br>PMP-3 |
|-----------|------|-------------|---------------|---------------|---------------|--------------|--------------|--------------|
| HeLa      | 7.03 | 0.445       | 12.2          | 13.0          | 12.0          | 11.7         | 12.0         | 12.8         |
| MCF-7/ADR | 40.8 | 113         | 59.5          | 53.8          | 68.9          | 66.1         | 70.8         | 69.5         |

**Table S2.** Times for 50% drug release ( $t_{1/2}$ ) calculated based on zero order drug release kinetics. Curve-fitting was done by linear regression using the means of triplicate experiments for PMPs nanoparticles in the presence of 10 mM DTT.

| UCL-PMP-1     |       | UCL-PMP-2     |       | UCL-PMP-3     |       | CL-PMP-1      |       | CL-PMP-2      |       | CL-PMP-3      |       |
|---------------|-------|---------------|-------|---------------|-------|---------------|-------|---------------|-------|---------------|-------|
| $t_{1/2}$ (h) | $r^2$ |
| 40.3          | 0.958 | 43.4          | 0.989 | 40.9          | 0.941 | 38.3          | 0.982 | 40.1          | 0.997 | 42.7          | 0.982 |

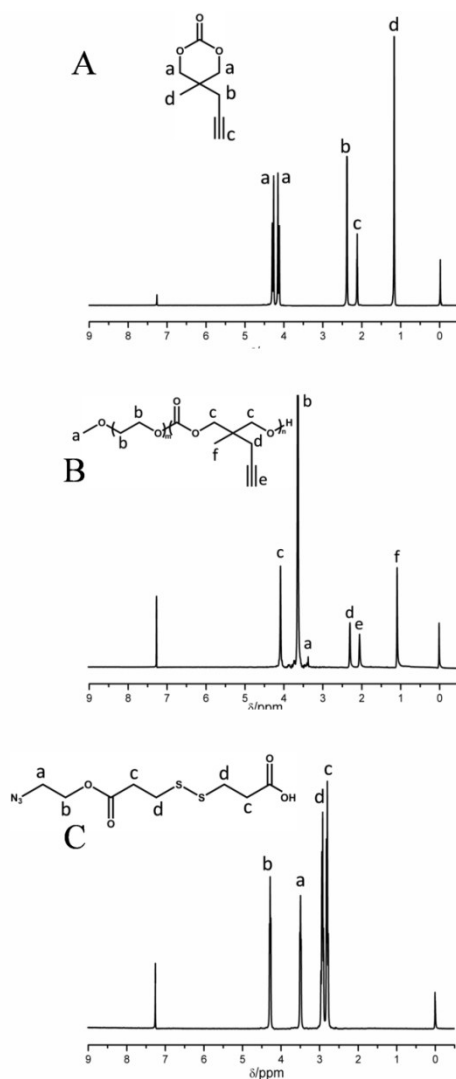

**Fig. S1.** <sup>1</sup>H NMR spectra (300 MHz, CDCl<sub>3</sub>) of MPMC (A), PEG-*b*-PMPMC (B) and ASA (C).

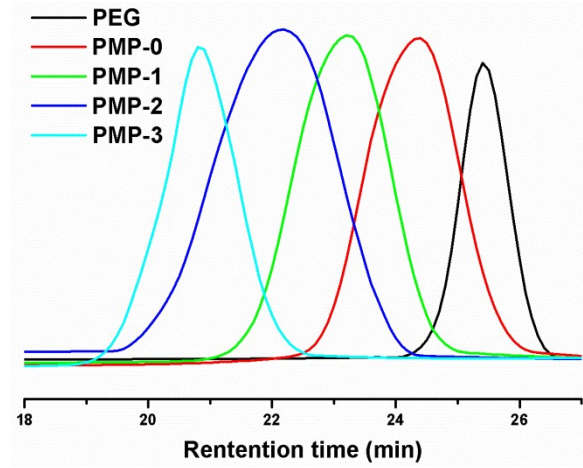

Fig. S2. GPC traces of PEG, PMP-0, PMP-1, PMP-2 and PMP-3.

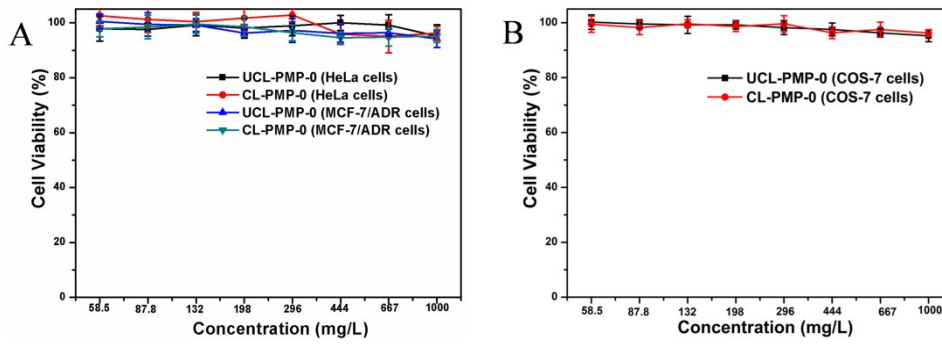

Fig. S3. MTT assay of UCL-PMP-0 and CL-PMP-0 blank micelles in HeLa cells and MCF-7/ADR cells (A), and COS-7 cells (B) after incubation for 48 h.

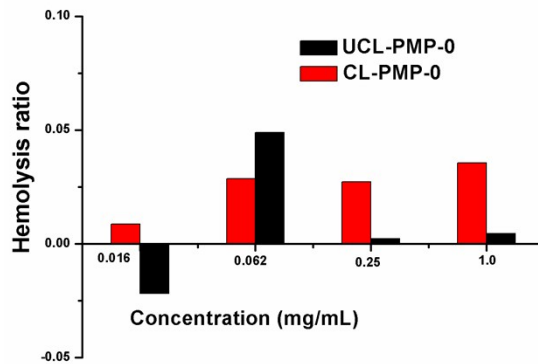

Fig. S4. The hemolysis ratio induced by UCL-PMP-0 and CL-PMP-0 with different concentration incubated at 37 °C for 3 h.

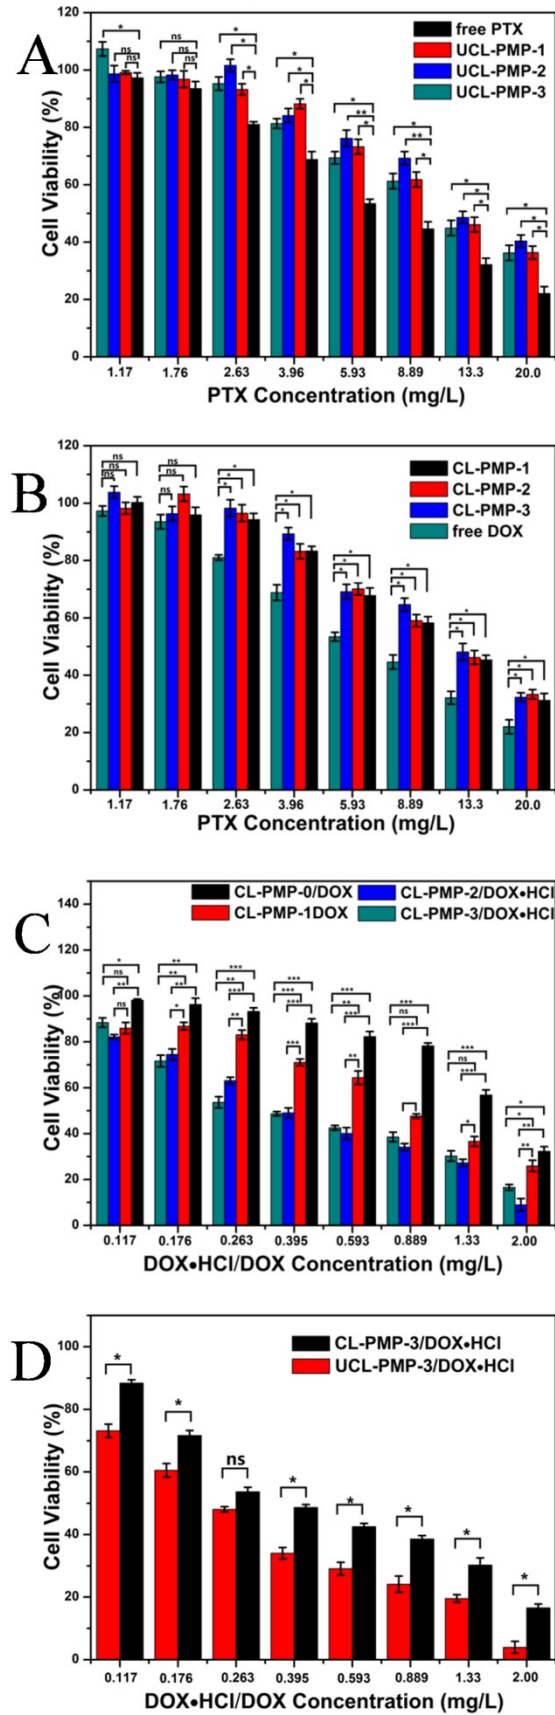

**Fig. S5.** Statistical analysis of MTT assay of free PTX and PMPs nanoparticles in HeLa cells after incubation for 48 h. (\* $P < 0.05$ , \*\* $P < 0.01$ , \*\*\* $P < 0.001$ , ns = not significant)

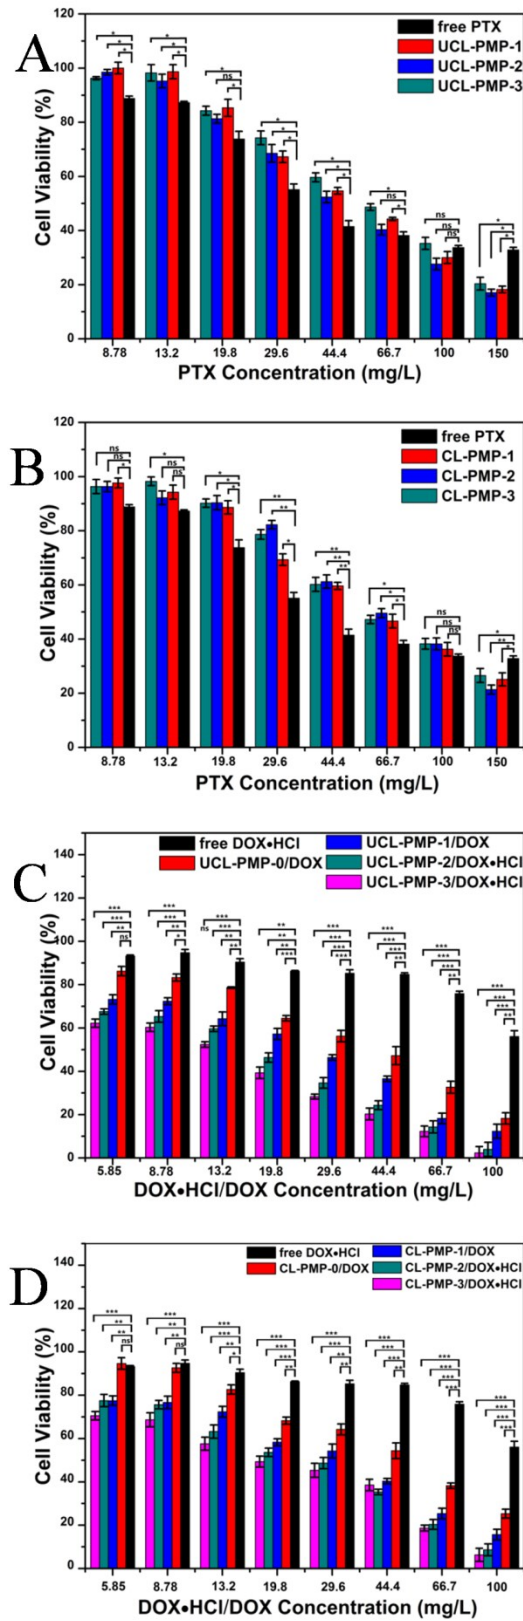

**Fig. S6.** Statistical analysis of MTT assay of free PTX and PMPs nanoparticles in MCF-7/ADR cells after incubation for 48 h. (\* $P < 0.05$ , \*\* $P < 0.01$ , \*\*\* $P < 0.001$ , ns = not significant)
